# Supplementary material for: Nucleic acid mediated activation of a short prokaryotic Argonaute immune system
Source: PubMed Central journal article supplement (PMC11156904; doi:10.1038/s41467-024-49271-4), 2024-06-06
Supplement: 41467_2024_49271_MOESM1_ESM.pdf [file 41467_2024_49271_MOESM1_ESM.pdf]

## **Supplementary Information**

### **Nucleic Acid Mediated Activation of a Short Prokaryotic Argonaute Immune System**

Jithesh Kottur<sup>1,2\*</sup>†, Radhika Malik<sup>1\*</sup>†, and Aneel K. Aggarwal<sup>1†</sup>

<sup>1</sup>Department of Pharmacological Sciences, Icahn School of Medicine at Mount Sinai, New York, NY, 10029, USA

<sup>2</sup>Department of Antiviral Drug Research, Institute of Advanced Virology, Thiruvananthapuram, Kerala, 695317, India

\* These authors contributed equally to this work

†Corresponding authors:

E-mail: [jitheshkottur@iav.res.in](mailto:jitheshkottur@iav.res.in)

E-mail: [radhika.malik@mssm.edu](mailto:radhika.malik@mssm.edu)

E-mail: [aneel.aggarwal@mssm.edu](mailto:aneel.aggarwal@mssm.edu)

This file includes:

Supplementary Figures 1-11

Supplementary Table 1 and 2

Supplementary References

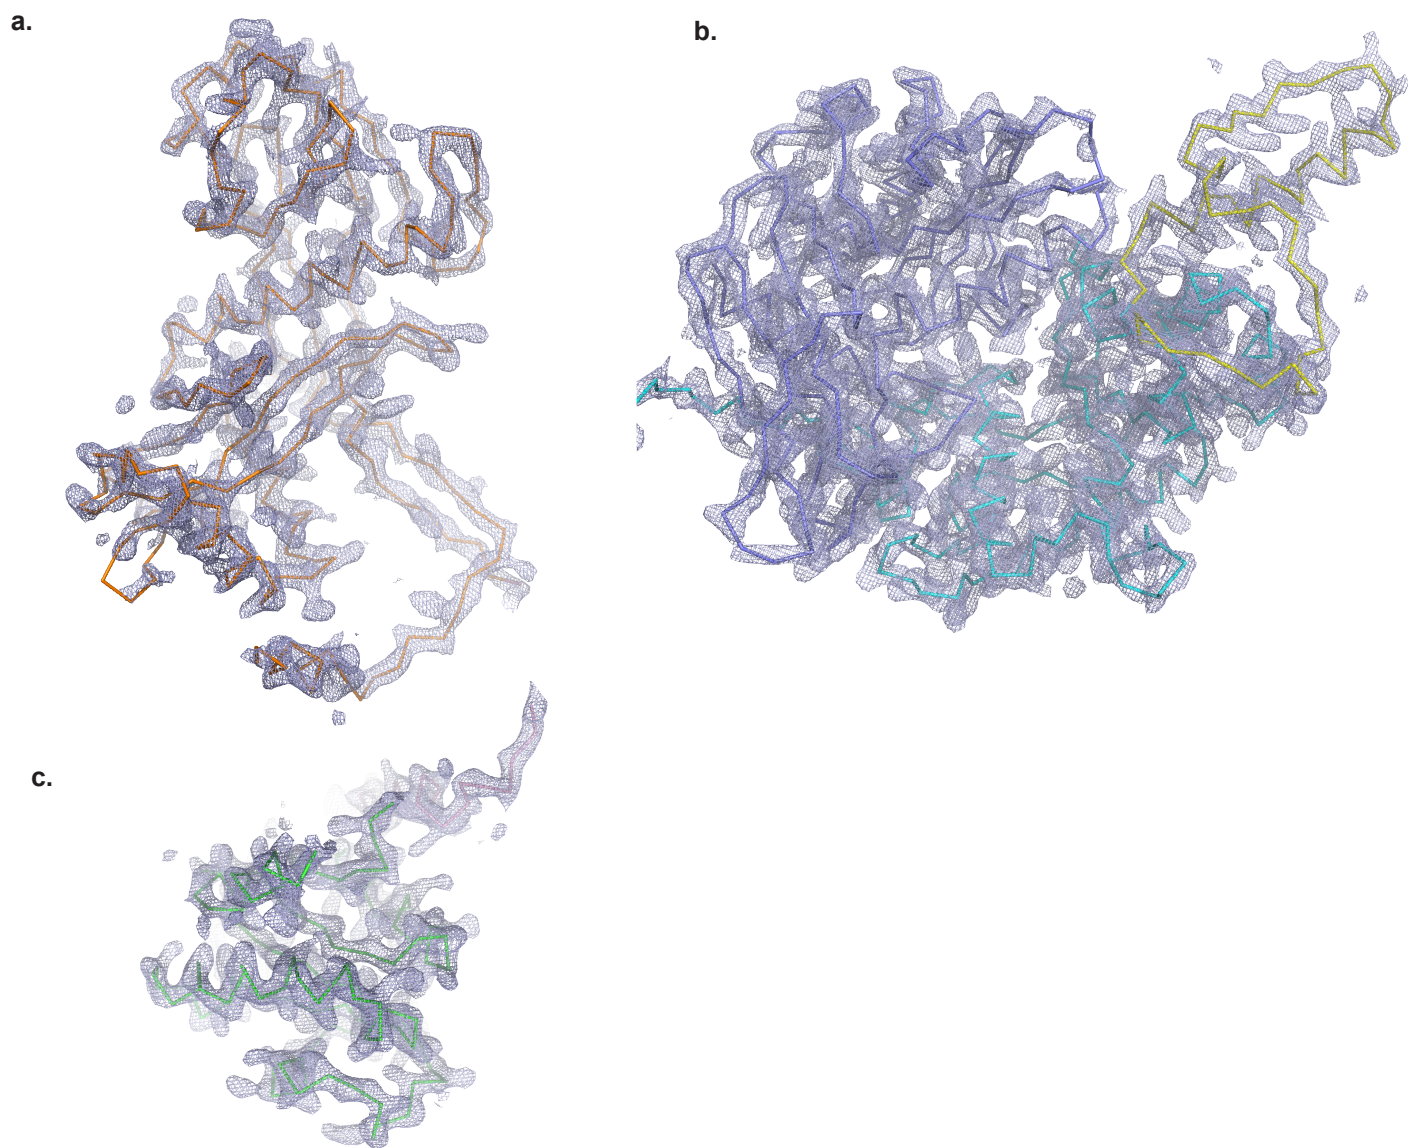

**Supplementary Figure 1. Electron density maps of SPARTA domains.** 2Fo-Fc maps of (a) APAZ, (b) Short pAgo and (c) TIR domains were shown at a contour level of  $1.5\sigma$ . The individual domains are represented as ribbon form. APAZ domain is colored as orange, MID, Insert57 and PIWI domain are colored cyan, yellow and slate, respectively. The TIR domain and connector helix are colored as green and magenta respectively.

a.

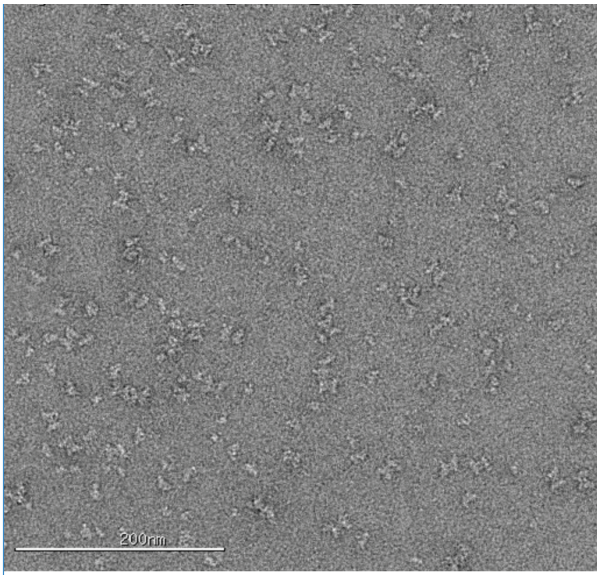

b.

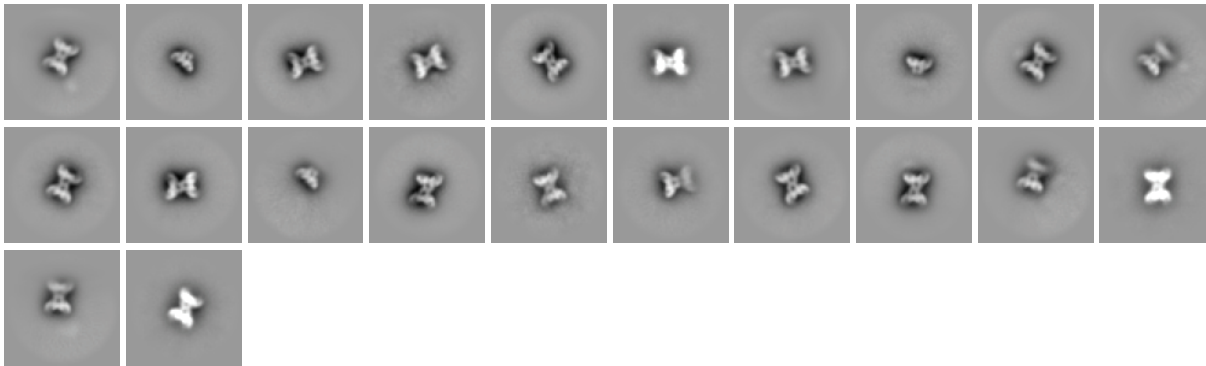

c.

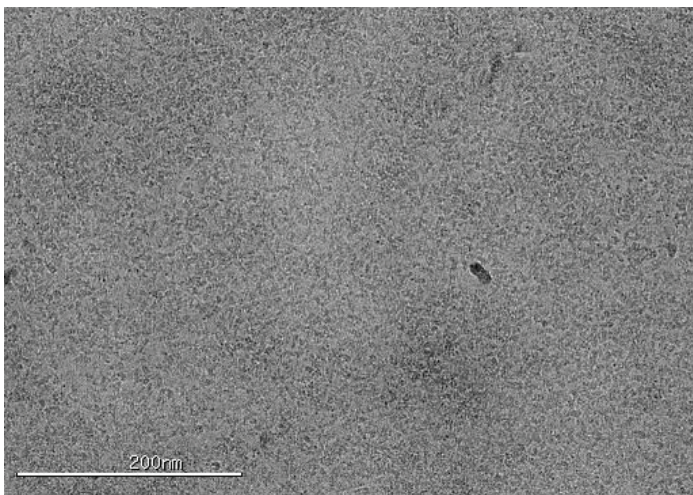

**Supplementary Figure 2. Negative stain and cryo-electron microscopy .** (a) Representative micrograph of a negatively stained sample of the SPARTA complex. Scale bar is 200 nm. The sample was stained with uranyl formate. (b) Representative 2-D classes after collect-ing data on negatively stained samples of the SPARTA oligomer (c) Representative micrograph of the tilted cryo-EM data of the SPARTA oligomer. This micrograph was imaged by tilting the stage to 30°.

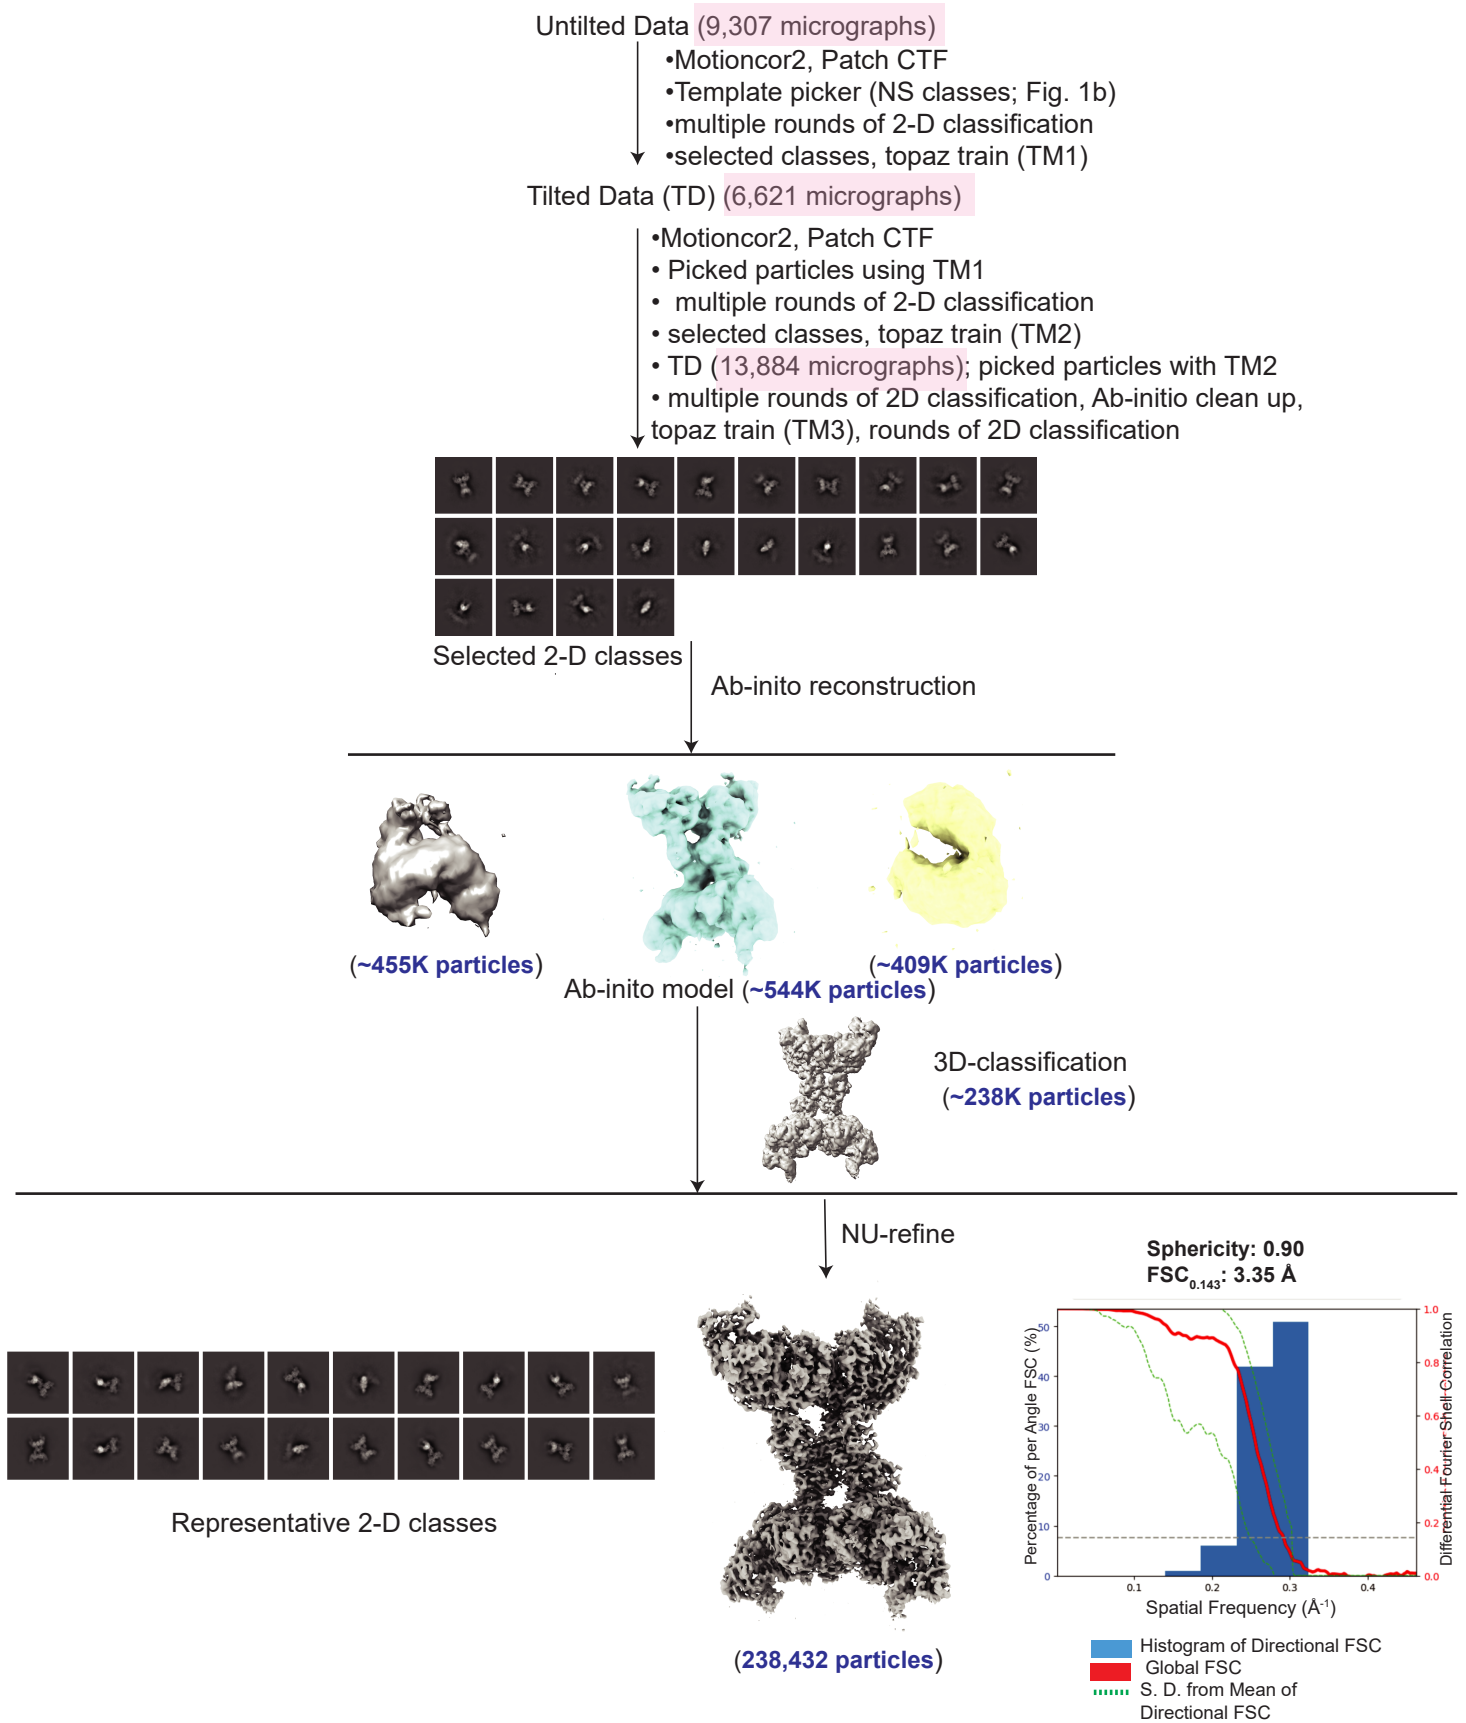

**Supplementary Figure 3. Cryo-EM analysis of the SPARTA complex.** An overview workflow of the cryo-EM image processing for the SPARTA complex is shown. Schematic shows particle picking using template picker and Topaz. Various stages of data processing includes 2-D classification, Ab-initio clean-up and 3-D classification using cryoSPARC. The number of micrographs collected is highlighted in pink. The number of particles at the various stages of data processing are shown in blue. The map calculated after global refinement has a FSC<sub>0.143</sub> of 3.35 Å. The 3D FSC plot to access the directional anisotropy is shown and the calculated sphericity is 0.90.

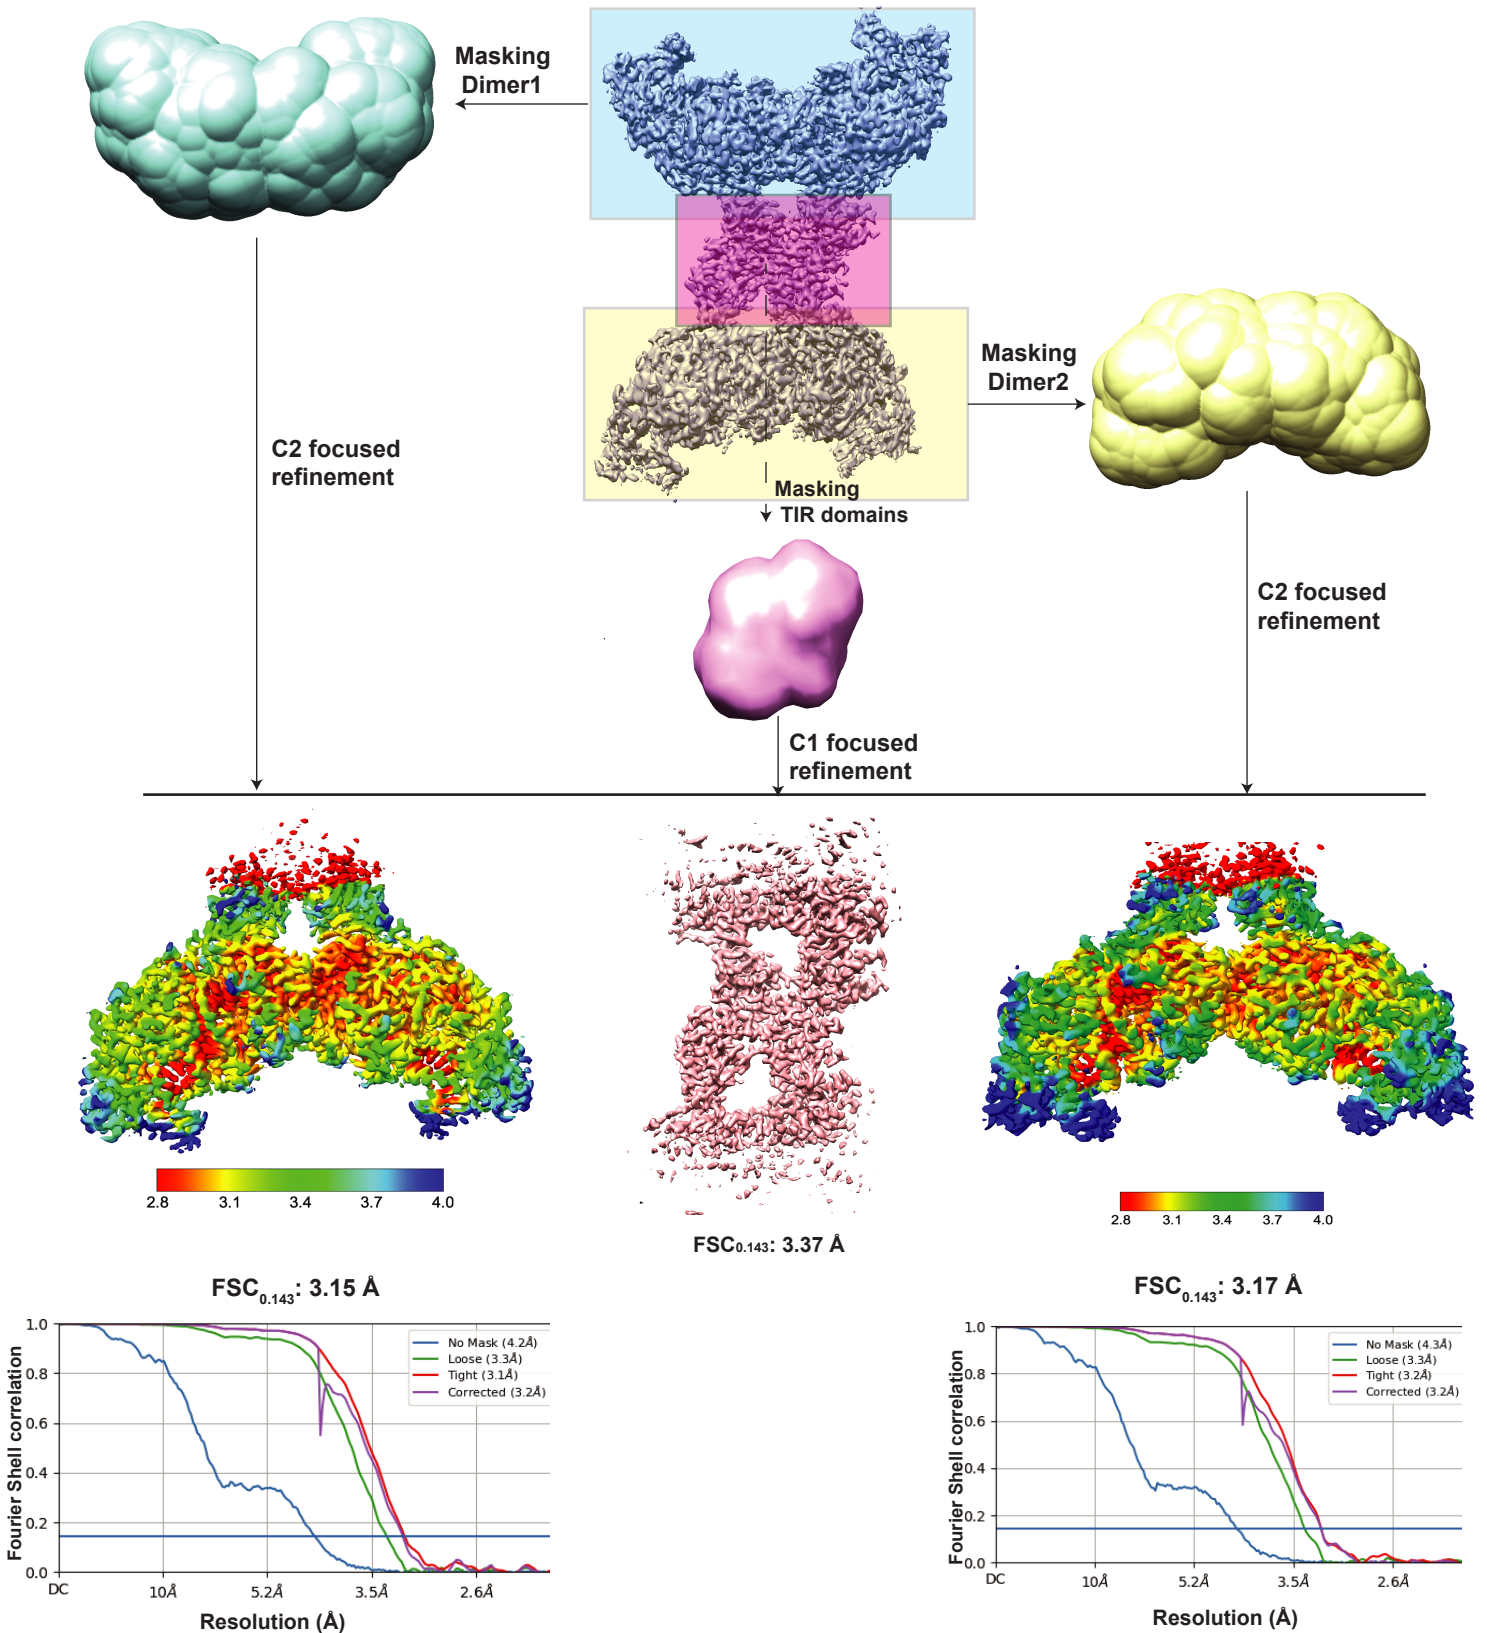

**Supplementary Figure 4. Focused refinements of the SPARTA complex.** A schematic workflow of the C2 symmetry based focused refinement of the 'wings' (APAZ-MID-PIWI-RNA/DNA) is described. Improvement in the resolution of the 'wings' is shown by the local resolution maps and their respective fourier shell correlation curves. FSC curves are shown and the nominal resolution of the focused maps for the 'wings' are 3.15 Å and 3.17 Å, respectively.

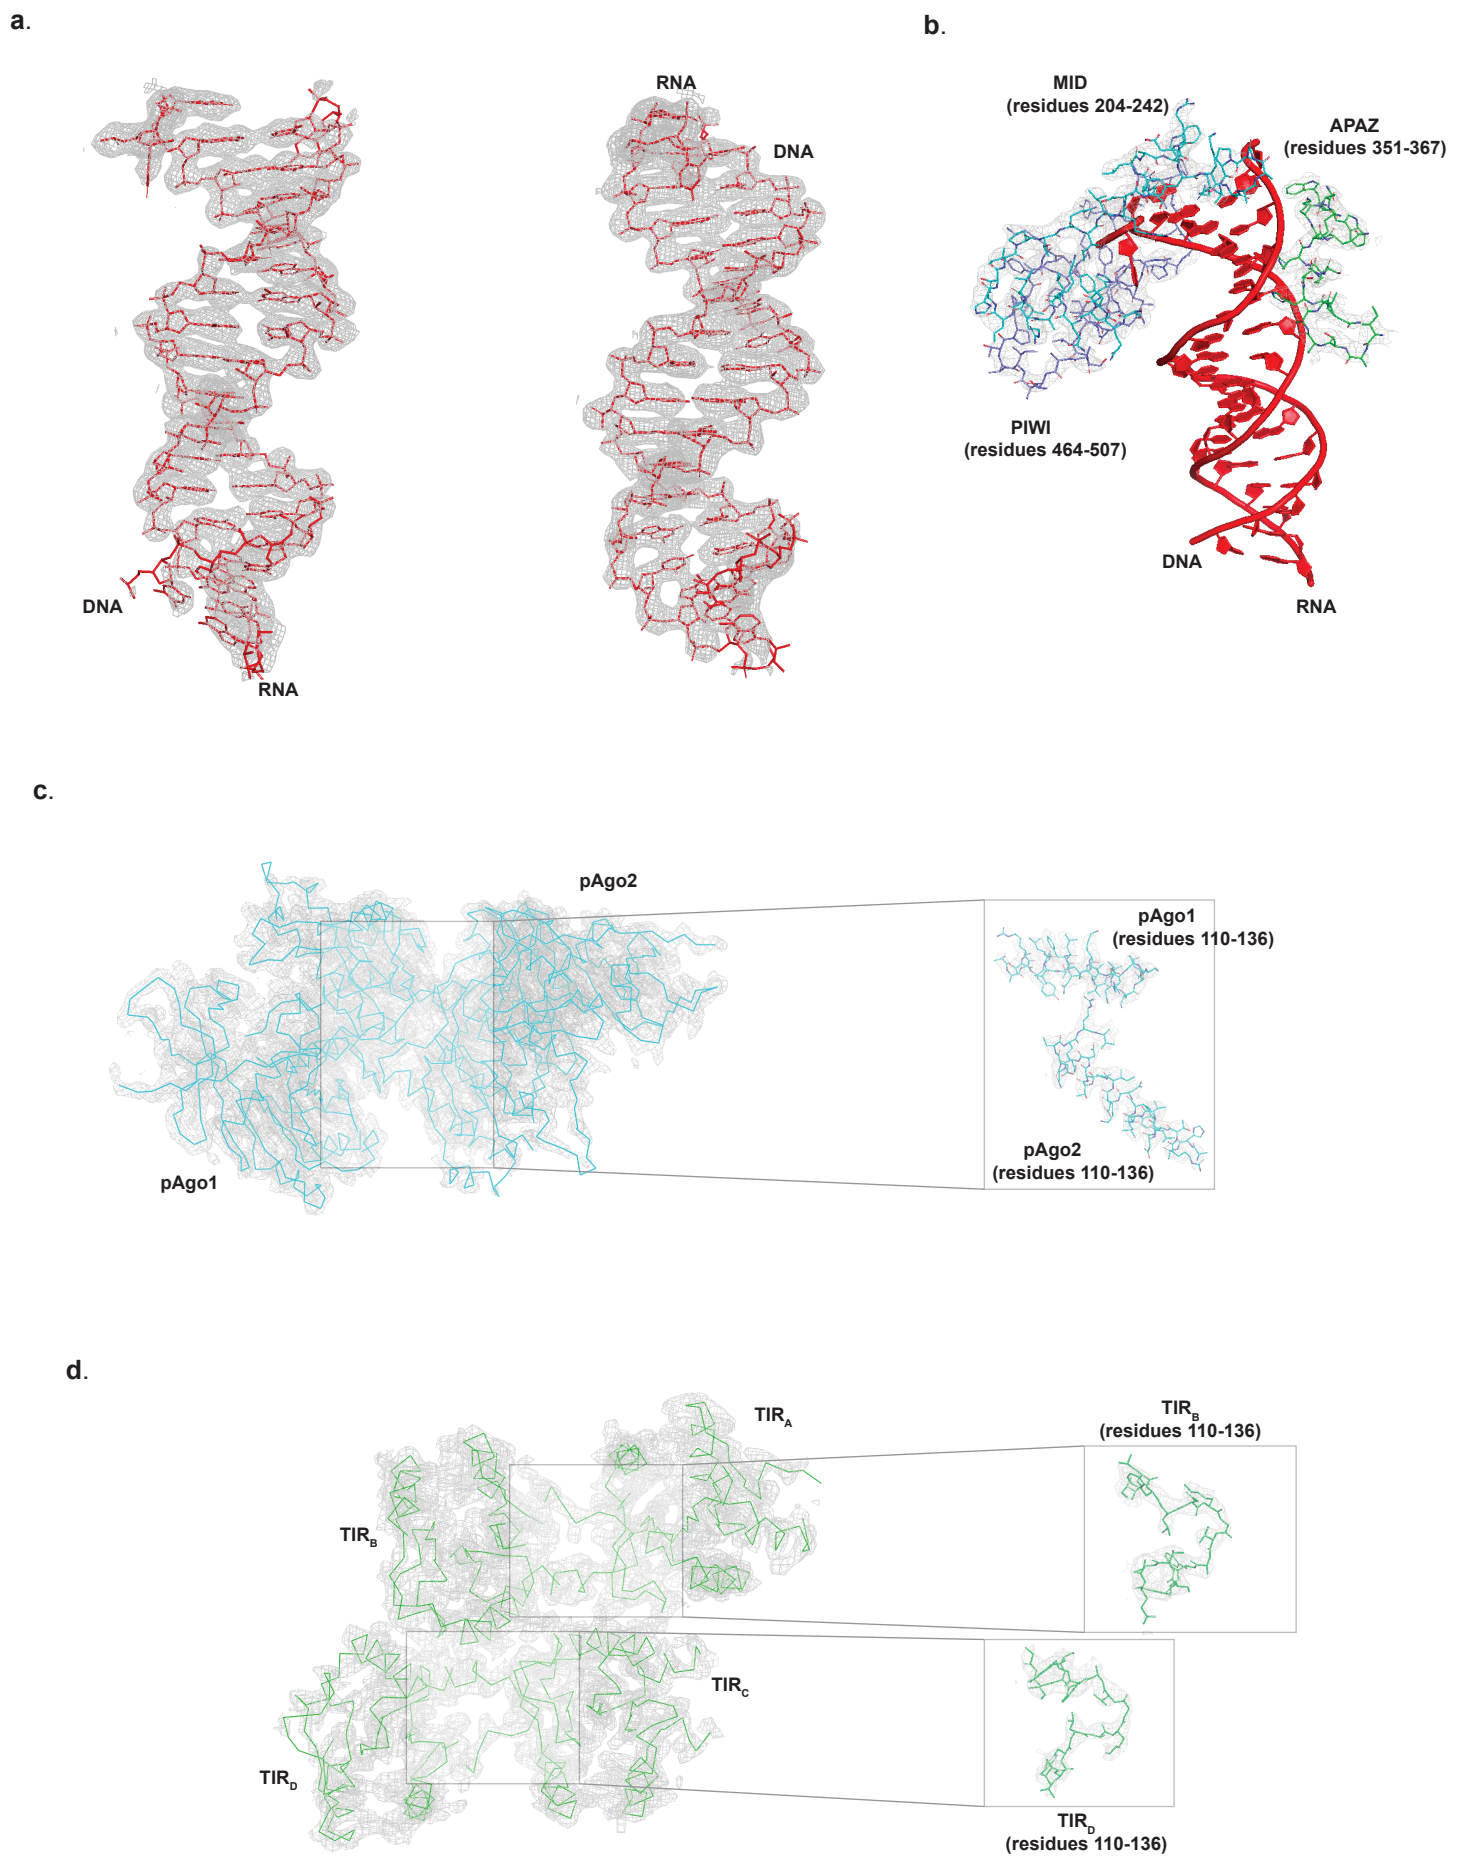

**Supplementary Figure 5. Cryo-EM density for key regions of the SPARTA oligomer.** (a) Cryo-EM density of the ligand, DNA/RNA duplex in two different orientations ( $90^\circ$  apart) is shown. (b) Cryo-EM density of the key regions of MID (cyan) and PIWI (purple) domains of pAgo and APAZ (green) domain which are interacting with the RNA/DNA is depicted. (c) Cryo-EM density of one of the pAgo dimers and a close-up view of a section of the dimer interface is shown. (d) Cryo-EM density of all the TIR domains is shown and a section of the interface from TIR<sub>B</sub> and TIR<sub>D</sub> is shown in detail.

a.

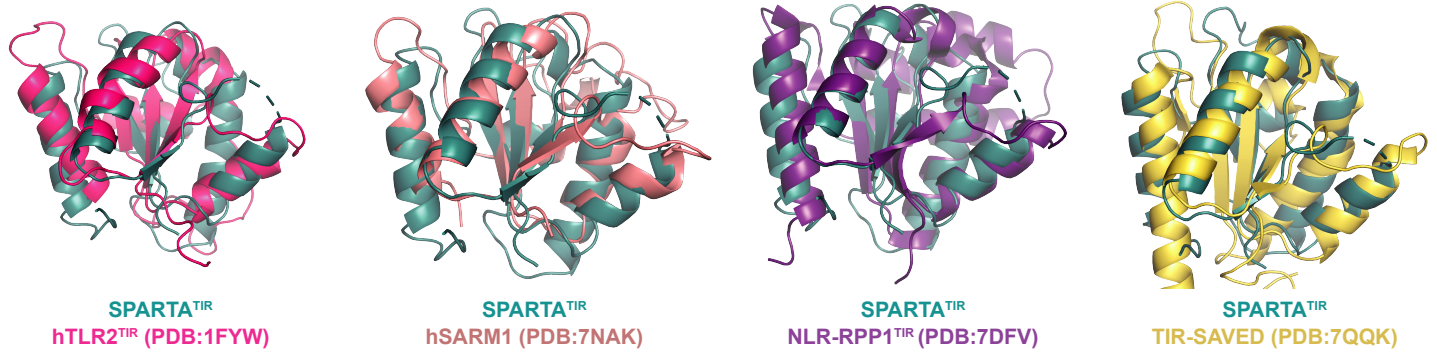

b.

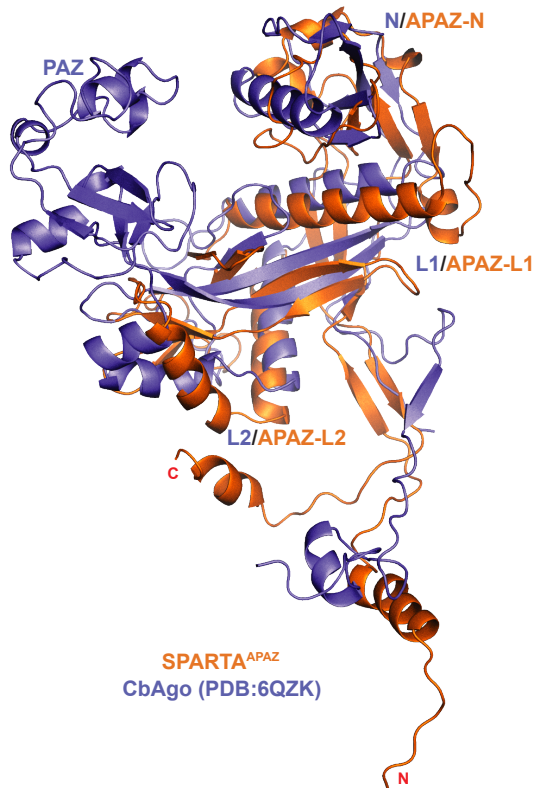

c.

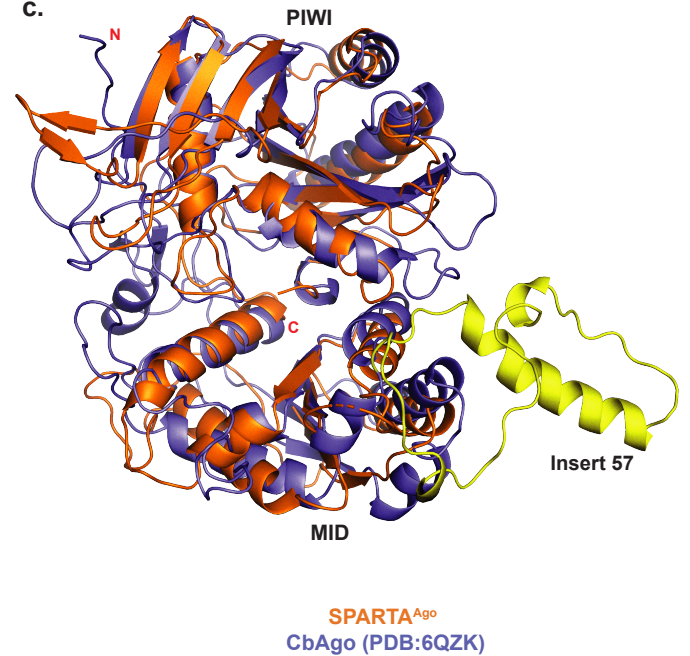

**Supplementary Figure 6. Structural alignment of Apo SPARTA domains with homologous proteins.** (a) SPARTA TIR domain structurally aligned to TIR domains from proteins with scaffolding roles (hTLR2<sup>TIR</sup>, PDB:1FYW and TIR-SAVED, PDB:7QQK) and enzymatic roles (hSARM1, PDB:7NAK and NLR-RPP1<sup>TIR</sup>, PDB:7DFV). (b) SPARTA APAZ domain structurally aligned with the N-PAZ-L1-L2 regions of *Clostridium butyricum* (Cb) long pAgo (PDB ID: 6QZK). (c) SPARTA MID and PIWI domains structurally aligned to the MID and PIWI domains of Cb long pAgo (PDB ID: 6QZK).

Sequence alignment between S2A clade short pAgo proteins

Table showing sequence alignment between S2A clade short pAgo proteins and CrtSPARTA. Includes an 'Insert 57' section. Rows list protein names and IDs (e.g., CrtSPARTA 101, WP\_027160976.1) and their corresponding amino acid sequences.

Sequence comparison between S2B clade short pAgo proteins with CrtSPARTA

Table showing sequence comparison between S2B clade short pAgo proteins and CrtSPARTA. Includes an 'Insert 57' section. Rows list protein names and IDs (e.g., CrtSPARTA 101, WP\_092996166.1) and their corresponding amino acid sequences.

Sequence comparison between S1B clade short pAgo proteins with CrtSPARTA

Table showing sequence comparison between S1B clade short pAgo proteins and CrtSPARTA. Includes an 'Insert 57' section. Rows list protein names and IDs (e.g., CrtSPARTA 101, WP\_274305503.1) and their corresponding amino acid sequences.

Sequence comparison between S1A clade short pAgo proteins with CrtSPARTA

Table showing sequence comparison between S1A clade short pAgo proteins and CrtSPARTA. Includes an 'Insert 57' section. Rows list protein names and IDs (e.g., CrtSPARTA 102, WP\_078814669.1) and their corresponding amino acid sequences.

Sequence alignment between short pAgo (CrtSPARTA) and long pAgo

Table showing sequence alignment between short pAgo (CrtSPARTA) and long pAgo. Rows list protein names and IDs (e.g., CrtSPARTA 98, CbAgo 36, TrAgo 42) and their corresponding amino acid sequences.



**Supplementary Figure 7. Sequence alignment of CrtSPARTA pAgo with short and long pAgos.** CrtSPARTA pAgo (of clade S2A) aligned with all short pAgo clades (S2A, S2B, S1B, and S1A), as well as long pAgos (*Clostridium butyricum* CbAgo and *Thermus thermophilus* TtAgo). Insert57 in the short pAgo clades is highlighted in a dashed red box. Sequence alignments were conducted using Jalview software<sup>1</sup>.

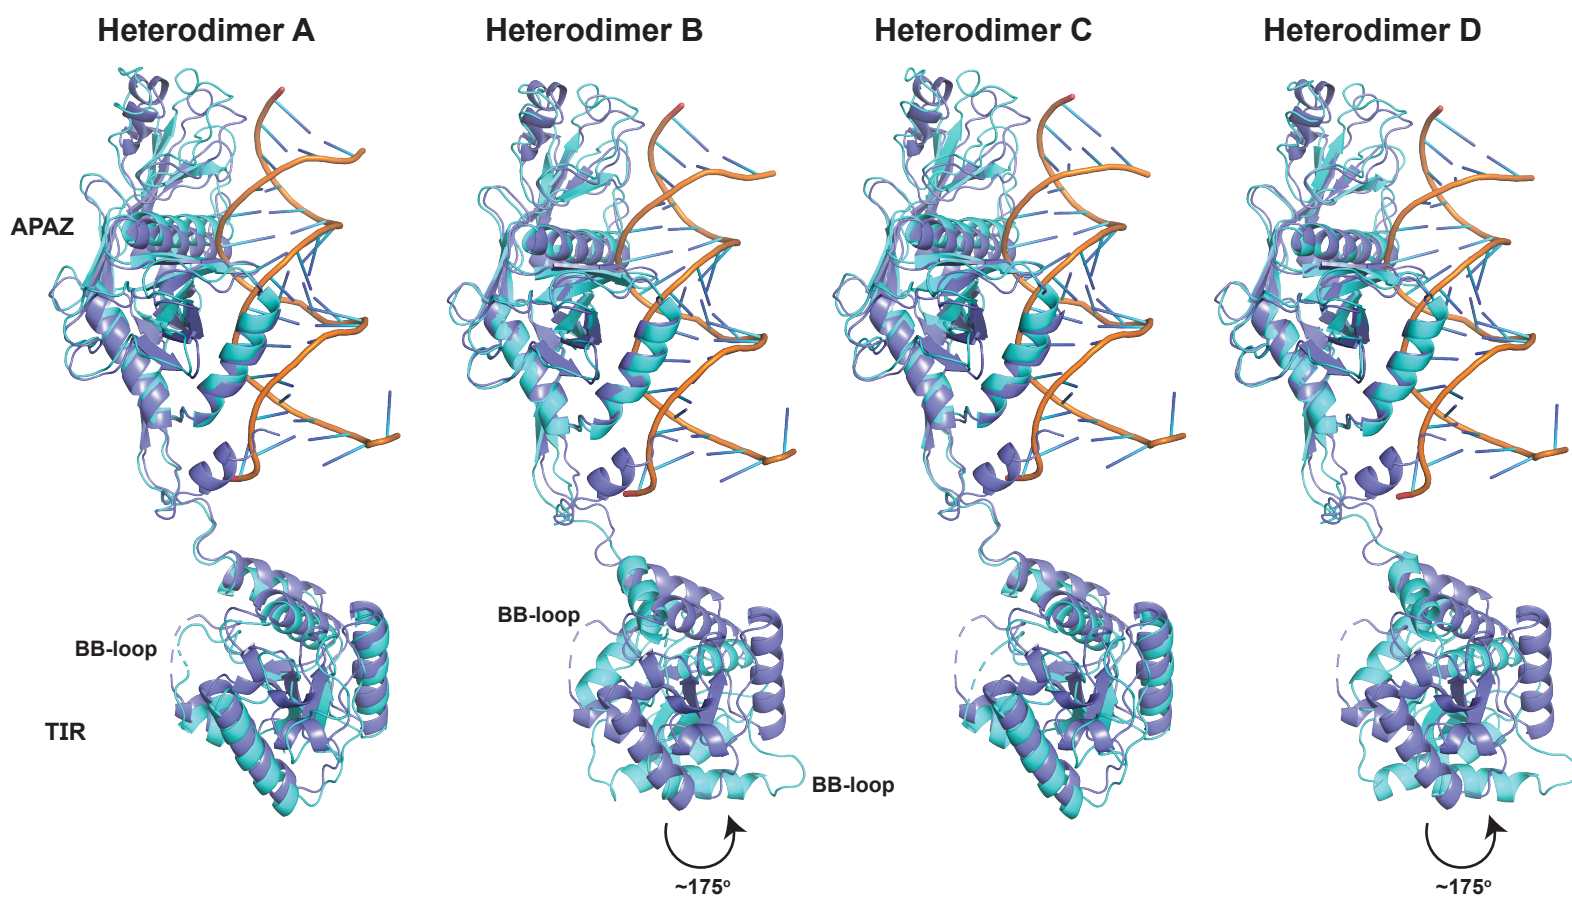

**Supplementary Figure 8. Conformational changes of the TIR domain in the SPARTA heterodimers.** Comparison of the TIR and APAZ domains in the inactive Apo SPARTA heterodimer versus the heterodimers A-D in the activated SPARTA oligomer. In the heterodimers B and D, the TIR domain undergoes  $\sim 175^\circ$  rotation, as shown in the figure. The location of the BB-loop is marked to identify the conformational change.

a.

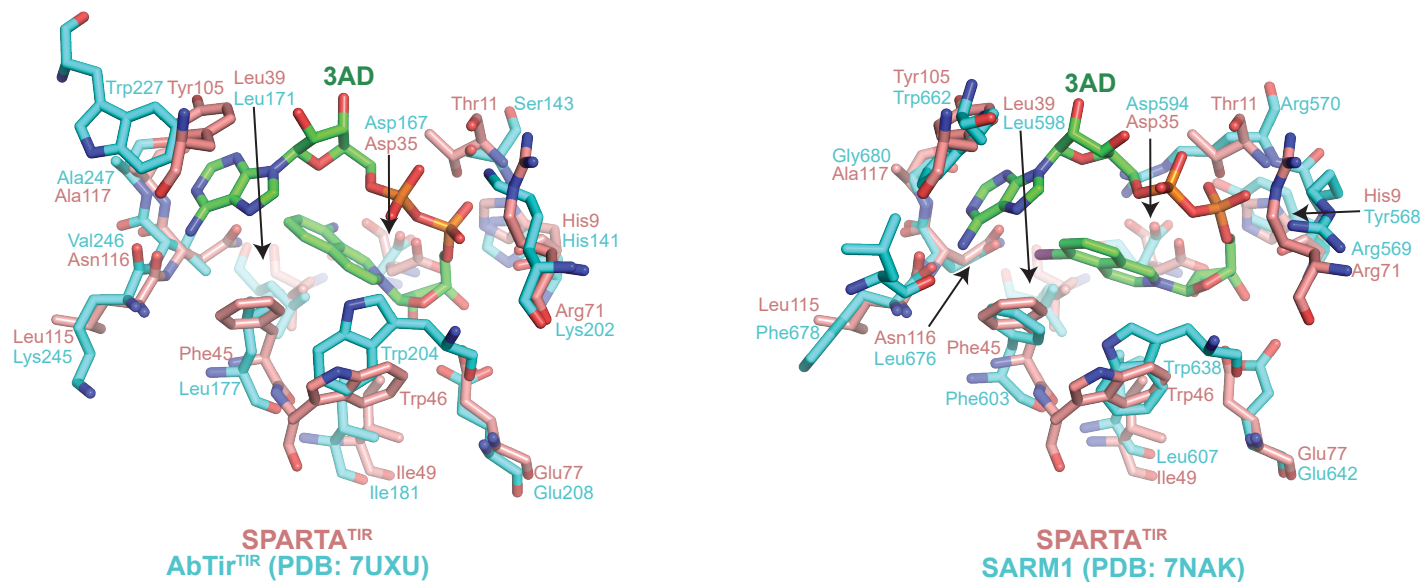

b.

SPARTA<sup>TIR</sup> modeled with NAD<sup>+</sup>

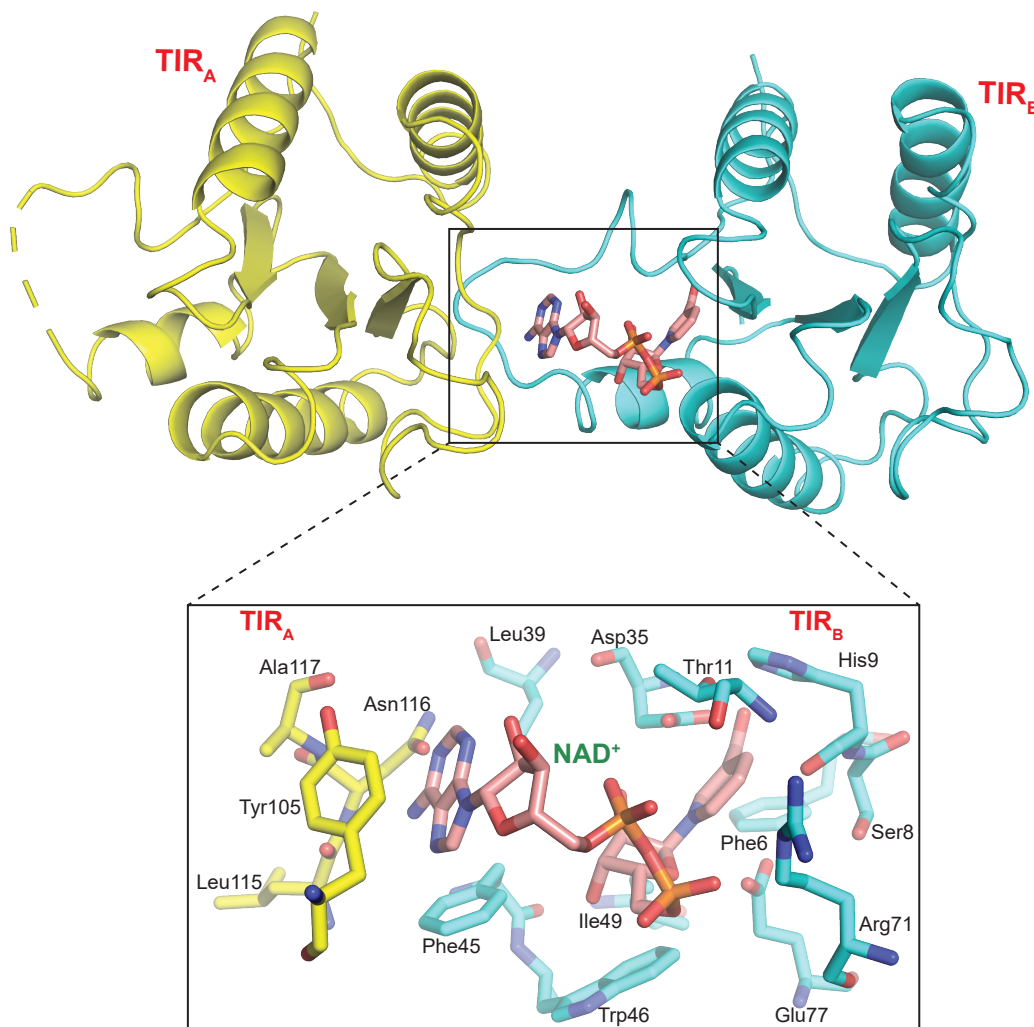

c. Sequence alignment of enzymatically active prokaryotic and eukaryotic TIR domains with CrtSPARTA

|                              | 1     | 10  | 20      | 30   | 40  | 50 | 60  | 70  | 80 | 90 | 100 |     |     |     |     |    |     |     |    |     |   |     |    |    |    |    |    |    |    |     |      |     |   |     |     |     |    |    |    |    |     |    |     |   |     |     |    |   |    |   |     |     |     |   |     |     |   |    |   |     |   |    |    |     |   |   |     |     |   |   |     |   |     |     |     |     |     |     |     |     |     |     |     |   |     |     |   |     |   |     |   |     |   |     |     |   |     |     |   |     |     |     |     |     |     |   |     |     |   |   |   |   |   |
|------------------------------|-------|-----|---------|------|-----|----|-----|-----|----|----|-----|-----|-----|-----|-----|----|-----|-----|----|-----|---|-----|----|----|----|----|----|----|----|-----|------|-----|---|-----|-----|-----|----|----|----|----|-----|----|-----|---|-----|-----|----|---|----|---|-----|-----|-----|---|-----|-----|---|----|---|-----|---|----|----|-----|---|---|-----|-----|---|---|-----|---|-----|-----|-----|-----|-----|-----|-----|-----|-----|-----|-----|---|-----|-----|---|-----|---|-----|---|-----|---|-----|-----|---|-----|-----|---|-----|-----|-----|-----|-----|-----|---|-----|-----|---|---|---|---|---|
| <b>CrtSPARTA-TIR</b>         | MRNKI | IS  | SHATPED | DDFT | --- | R  | VL  | SL  | KL | IG | LG  | YEV | --- | W   | CI  | IL | FL  | DK  | GV | DF  | V | ST  | IK | ET | RE | NT | CK | FL | IV | SS  | TAGN | --- | K | REG | V   | L   | KE | LA | VA | TK | V   | KK | H   | L | Q   | D   | DM | F | I  | P | LA  | ID  | EN  | L | --- | S   | Y | DD | I | --- |   |    |    |     |   |   |     |     |   |   |     |   |     |     |     |     |     |     |     |     |     |     |     |   |     |     |   |     |   |     |   |     |   |     |     |   |     |     |   |     |     |     |     |     |     |   |     |     |   |   |   |   |   |
| <i>TirS</i> -WP_000114516.1  | IEYDV | FL  | SHSSLDK | EDYV | --- | S  | K   | ISE | KL | IE | KL  | KV  | --- | F   | ED  | V  | K   | V   | F  | E   | I | G   | K  | S  | T  | ET | M  | N  | M  | IL  | NS   | R   | F | V   | V   | FL  | S  | P  | N  | F  | I   | E  | --- | S | G   | AS  | RY | E | FL | S | FL  | N   | R   | E | I   | --- | E | E  | H | V   | I | LP | WH | --- | K | V | --- | S   | V | E | D   | V | R   | A   |     |     |     |     |     |     |     |     |     |   |     |     |   |     |   |     |   |     |   |     |     |   |     |     |   |     |     |     |     |     |     |   |     |     |   |   |   |   |   |
| <i>TcpO</i> -WP_074798936.1  | KEYDI | FV  | SHSSEDK | EDFV | --- | K  | E   | V   | N  | L  | L   | K   | G   | L   | S   | V  | --- | W   | Y  | D   | D | I   | V  | K  | I  | G  | H  | N  | L  | R   | K    | I   | S | G   | K   | S   | S  | N  | Y  | A  | V   | V  | I   | F | S   | E   | D  | F | F  | K | --- | S   | K   | W | T   | N   | Y | E  | D | N   | I | F  | L  | --- | D | F | Y   | --- | D | E | E   | K | V   | L   | P   | L   | H   | --- | D   | L   | --- | T   | I   | E | D   | L   | E | K   |   |     |   |     |   |     |     |   |     |     |   |     |     |     |     |     |     |   |     |     |   |   |   |   |   |
| <i>BtpA</i> -WP_004684737.1  | EEYDF | FV  | SHASEDK | EAFV | --- | Q  | D   | L   | V  | A  | A   | R   | D   | L   | G   | A  | I   | --- | F  | Y   | D | A   | Y  | T  | L  | K  | V  | G  | D  | S   | L    | R   | R | I   | D   | Q   | L  | A  | N  | S  | K   | F  | G   | I | V   | V   | L  | S | E  | H | F   | F   | --- | K | Q   | A   | P | A  | R | E   | L | D  | G  | L   | T | A | M   | E   | I | G | --- | G | --- | Q   | T   | R   | --- | L   | P   | --- | W   | H   | --- | K | V   | --- | S | Y   | D | E   | V | R   |   |     |     |   |     |     |   |     |     |     |     |     |     |   |     |     |   |   |   |   |   |
| <i>AbTIR</i> -EJB8469465.1   | PEYDL | FV  | SHASEDK | EDFV | --- | R  | --- | P   | L  | A  | E   | T   | Q   | L   | G   | V  | N   | --- | W  | Y   | D | E   | F  | T  | L  | K  | V  | G  | D  | S   | L    | R   | Q | I   | D   | S   | G  | L  | R  | N  | S   | K  | Y   | G | T   | V   | V  | L | S  | T | D   | F   | I   | K | --- | K   | D | W  | T | N   | Y | E  | L  | D   | G | L | V   | A   | R | E | M   | N | --- | G   | --- | H   | K   | M   | --- | L   | P   | --- | W   | H | --- | K   | I | --- | T | K   | N | D   | V | L   |     |   |     |     |   |     |     |     |     |     |     |   |     |     |   |   |   |   |   |
| <i>ThsB</i> -WP_001129548.1  | ---   | --- | K       | R    | V   | F  | S   | F   | H  | Y  | Q   | D   | V   | --- | I   | D  | F   | R   | V  | N   | V | R   | N  | H  | W  | T  | K  | L  | N  | Q   | S    | A   | A | G   | V   | D   | A  | S  | L  | W  | E   | D  | A   | K | --- | K   | T  | S | D  | I | A   | L   | K   | R | L   | --- | I | N  | G | L   | N | N  | T  | S   | V | T | C   | V   | L | I | Q   | S | T   | F   | N   | --- | R   | R   | W   | Y   | E   | I   | M   | K | S   | I   | E | --- | K | --- | G | N   | K | --- | I   | G | H   | --- | N | A   | F   | K   | D   | K   | Y   | G | N   | I   | K |   |   |   |   |
| <i>BdTIR</i> -XP_003560074.3 | S     | R   | Y       | E    | V   | F  | I   | N   | H  | R  | G   | V   | D   | T   | K   | R  | T   | V   | A  | --- | R | --- | L  | L  | Y  | D  | R  | L  | A  | Q   | A    | L   | R | G   | --- | F   | L  | N  | M  | S  | M   | R  | P   | G | D   | R   | L  | E | E  | R | --- | I   | G   | S | A   | --- | I | R  | E | C   | T | V  | A  | V   | A | I | F   | S   | P | S | Y   | C | D   | --- | S   | E   | Y   | C   | L   | R   | E   | L   | A   | M | L   | V   | E | --- | S | --- | R | K   | A | --- | I   | P | --- | F   | Y | --- | D   | I   | --- | K   | P   | S | D   | L   | L |   |   |   |   |
| <i>BtTIR</i> -WP_195383607.1 | K     | Q   | Y       | D    | F   | F  | I   | S   | H  | A  | S   | E   | D   | K   | --- | D  | D   | I   | V  | --- | R | --- | D  | L  | A  | E  | A  | L  | R  | N   | N    | G   | F | E   | V   | --- | W  | Y  | D  | E  | F   | E  | L   | K | I   | G   | D  | S | L  | R | K   | --- | I   | D | Y   | G   | L | S  | N | A   | N | Y  | G  | I   | V | I | I   | S   | P | S | F   | V | K   | --- | K   | N   | W   | T   | E   | Y   | E   | L   | N   | G | M   | V   | A | R   | E | M   | N | --- | G | --- | H   | K | V   | --- | L | P   | --- | W   | H   | --- | K   | I | --- | T   | K | D | E | V | L |
| <i>RUN1</i> -KAJ9687320.1    | T     | T   | Y       | D    | V   | F  | L   | S   | F  | R  | G   | E   | D   | T   | R   | F  | N   | F   | T  | --- | D | --- | H  | L  | Y  | S  | A  | L  | G  | R   | R    | G   | I | S   | T   | --- | F  | R  | D  | K  | --- | L  | S   | R | G   | E   | A  | I | A  | P | E   | L   | L   | N | A   | --- | I | E  | K | S   | R | S  | S  | V   | I | V | F   | S   | E | N | Y   | A | R   | --- | S   | R   | W   | C   | L   | D   | E   | L   | V   | K | I   | M   | E | C   | H | K   | D | --- | L | --- | G   | H | A   | V   | F | P   | --- | F   | Y   | --- | H   | V | --- | D   | P | S | H | V | R |
| <i>RPP1</i> -NP_001326419.1  | V     | K   | H       | D    | V   | F  | P   | S   | F  | H  | G   | A   | D   | V   | R   | R  | T   | F   | L  | --- | S | --- | H  | I  | M  | E  | S  | F  | R  | R   | K    | G   | I | D   | T   | --- | F  | I  | D  | N  | --- | I  | E   | R | S   | K   | S  | I | G  | P | E   | L   | K   | E | A   | --- | I | K  | G | S   | K | I  | A  | I   | V | L | L   | S   | R | K | Y   | A | S   | --- | S   | S   | W   | C   | L   | D   | E   | L   | A   | E | I   | M   | K | C   | R | Q   | M | --- | V | --- | G   | Q | I   | --- | V | M   | T   | --- | F   | Y   | --- | E | V   | --- | D | P | T | I | K |
| <i>SARM1</i> -NP_055892.2    | D     | T   | P       | D    | V   | F  | I   | S   | Y  | R  | R   | N   | S   | G   | --- | S  | --- | L   | L  | K   | V | H   | L  | Q  | L  | H  | S  | F  | S  | --- | F    | I   | D | V   | E   | K   | L  | E  | A  | G  | --- | F  | E   | D | L   | --- | I  | Q | S  | V | M   | G   | A   | R | N   | F   | V | L  | V | L   | S | P  | G  | A   | L | D | K   | M   | Q | D | H   | D | C   | K   | D   | W   | H   | K   | E   | I   | V   | T   | A   | L | S   | --- | C | --- | G | K   | N | --- | I | P   | --- | I | D   | --- | G | F   | --- | E   | W   | P   | E   | P | Q   |     |   |   |   |   |   |

**Supplementary Figure 9. Comparison of TIR active sites and modeling of NAD<sup>+</sup>.** (a) Structural superposition of SPARTA active site formed across the TIR<sub>A</sub> and TIR<sub>B</sub> heterodimers with that in AbTir (PDB:7UXU) (left) and SARM1 (PDB: 7NAK) (right) containing bound 3AD. (b) TIR domains of SPARTA heterodimers modeled with NAD<sup>+</sup> and a close-up view of the active site showing the putative residues interacting with NAD<sup>+</sup>. (c) Sequence alignment of enzymatically active prokaryotic and eukaryotic TIR domains with SPARTA<sup>TIR</sup>. The active site residues are highlighted with asterisks (\*) and show conservation among members of enzymatically active TIR domains from bacterial (TirS, TcplO, BtpA, AbTIR, ThsB, BdTIR, BtTIR), plant (RUN1, RPP1), and human (SARM1). Sequence alignments were carried out using Jalview software<sup>1</sup>.

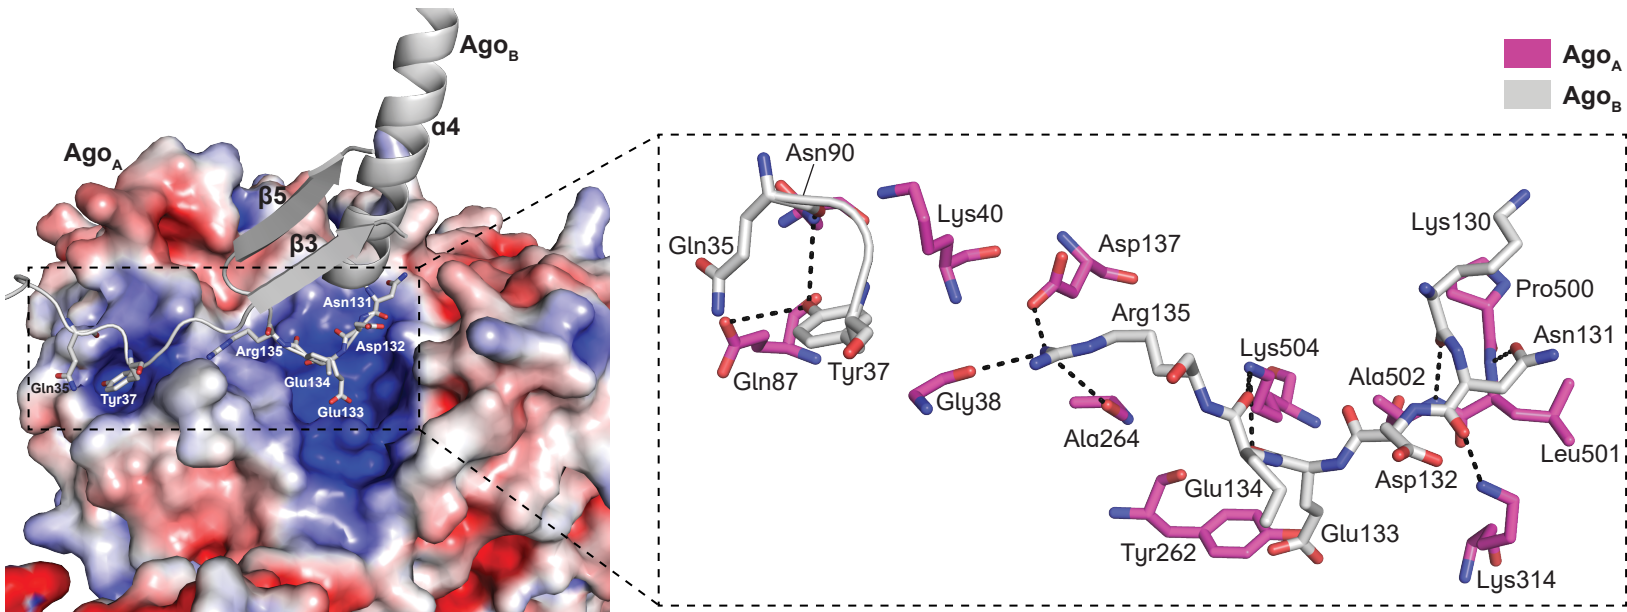

**Supplementary Figure 10. Structural basis for pAgo-mediated oligomerization.** Close-up view of the pAgo dimer interface showing a positively charged pocket on pAgo<sub>A</sub> receiving residues from pAgo<sub>B</sub>. Residues Gln35 and Tyr37 of pAgo<sub>B</sub> are involved in additional interactions with pAgo<sub>A</sub>.

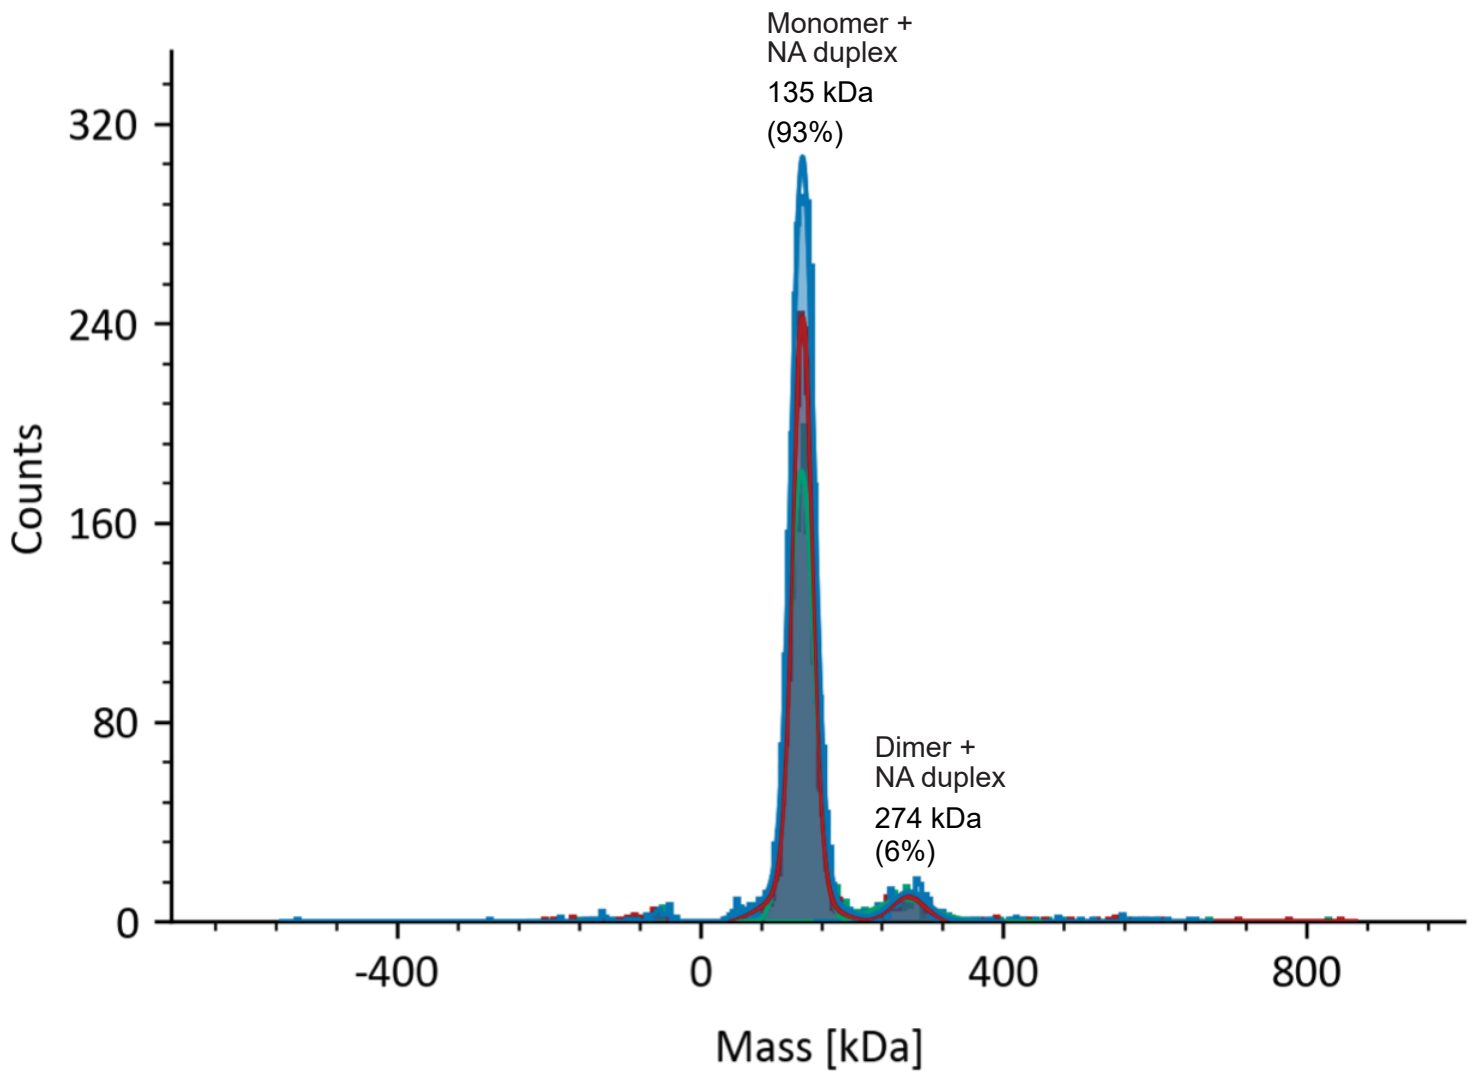

**Supplementary Figure 11. Mass photometry data for the SPARTA deletion mutant.** Mass photometry data for the SPARTA deletion mutant, in which residues from the loop10-9 were deleted (pAGO $\Delta$ AA322-327), incubated with guide RNA (gRNA) and target DNA (tDNA). The mass distribution plot shows that the majority of the population (~93%) is monomeric SPARTA bound to the gRNA/tDNA, with an average MW of ~134.6 kDa (close to the expected MW of 132.6 kDa) with only a very small fraction forming SPARTA dimeric-gRNA/tDNA complexes (~6%), with an average MW of ~273 kDa (close to the expected MW of 265.2 kDa) .

**Supplementary Table 1. X-ray data collection and refinement statistics for Apo-SPARTA**

| Apo-SPARTA (PDB: 8U7B)                               |                             |
|------------------------------------------------------|-----------------------------|
| <b>Data collection</b>                               |                             |
| Space group                                          | P6 <sub>5</sub> 22          |
| Cell dimensions                                      |                             |
| <i>a</i> , <i>b</i> , <i>c</i> (Å)                   | 197.18 Å, 197.18 Å 183.4 Å, |
| $\alpha$ , $\beta$ , $\gamma$ (°)                    | 90.00 90.00 120.00          |
| Resolution (Å)                                       | 170.76-2.66 (2.99-2.66)*    |
| <i>R</i> <sub>sym</sub> or <i>R</i> <sub>merge</sub> | 14.8 (176.7)                |
| <i>R</i> <sub>pim</sub>                              | 4.2 (55.4)                  |
| No. of unique reflections                            | 40914                       |
| <i>I</i> / $\sigma$ <i>I</i>                         | 13.7 (1.7)                  |
| Completeness (%)                                     | 96.2 (73.9)                 |
| (ellipsoidal)                                        |                             |
| Redundancy                                           | 13.3 (10.7)                 |
| CC(1/2)                                              | 1.00 (0.57)                 |
| <b>Refinement</b>                                    |                             |
| Resolution (Å)                                       | 49.71-2.66                  |
| No. reflections                                      | 40895                       |
| <i>R</i> <sub>work</sub> / <i>R</i> <sub>free</sub>  | 18.6/24.0                   |
| No. atoms                                            |                             |
| Macromolecules                                       | 7420                        |
| Ligands/Ions                                         | 2                           |
| Water                                                | 91                          |
| <i>B</i> -factors                                    |                             |
| Macromolecules                                       | 69.0                        |
| Ligands/Ions                                         | 67.0                        |
| Water                                                | 63.9                        |
| R.m.s. deviations                                    |                             |
| Bond lengths (Å)                                     | 0.003                       |
| Bond angles (°)                                      | 0.61                        |
| Ramachandran Plot                                    |                             |
| Favored (%)                                          | 93.0                        |
| Allowed (%)                                          | 6.5                         |
| Outliers (%)                                         | 0.5                         |

**Supplementary Table 2. CryoEM data collection, model refinement and validation statistics****SPARTA-gRNA-tDNA-Mg<sup>2+</sup>****PDB ID:8U72****EMDB IDs: EMD-41945,  
EMD-41947, EMD-41948,  
EMD-41959, EMD-41966**

---

**Data collection and processing**

|                                                 |           |
|-------------------------------------------------|-----------|
| Magnification (kV)                              | x81000    |
| Voltage (kV)                                    | 300       |
| Pixel Size (Å/pixel)                            | 1.083     |
| Electron dose (e <sup>-</sup> /Å <sup>2</sup> ) | 50.79     |
| Defocus range (µm)                              | 0.8 - 2.5 |
| Number of Micrographs                           | 13,884    |
| Tilt angle                                      | 30°, 45°  |
| Number of Particles                             | 238,432   |
| Nominal Map resolution (Å)                      | 3.35      |
| FSC threshold                                   | 0.143     |

**Refinement (Phenix)****Model composition**

|                    |       |
|--------------------|-------|
| Non-hydrogen atoms | 29715 |
| Protein residues   | 3469  |
| DNA/other          | 148/4 |

**R.M.S. deviations**

|                  |       |
|------------------|-------|
| Bond lengths (Å) | 0.003 |
| Bond Angles (°)  | 0.596 |

**Validation**

|                      |      |
|----------------------|------|
| Molprobrity score    | 1.90 |
| Clashscore           | 7.07 |
| Rotamer outliers (%) | 0.33 |
| Cβ outliers (%)      | 0.00 |

**Ramachandran Statistics (%)**

|          |       |
|----------|-------|
| Favored  | 91.16 |
| Allowed  | 8.78  |
| Outliers | 0.06  |

## Supplementary References.

1. Waterhouse, A. M., Procter, J. B., Martin, D. M., Clamp, M. & Barton, G. J. Jalview Version 2-a multiple sequence alignment editor and analysis workbench. *Bioinformatics* **25**, 1189-1191 (2009).
